# Supplementary material
Source: publisher site journal article supplement (https://www.dovepress.com/article/216318)
Supplement: Supplementary file 1 [file get_supplementary_file.php]

**Supplement Figures**


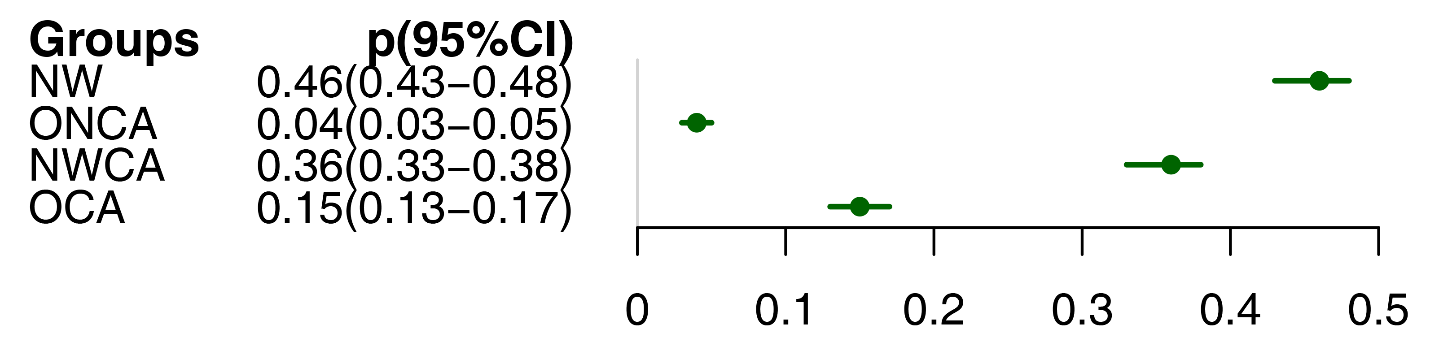


**Fig. S1 Prevalence with 95% confidence intervals of four different obesity and central adiposity groups in the whole participants**

**Supplement Tables**

| **Table S1. Baseline characteristics of the three studies** | | | | |
| --- | --- | --- | --- | --- |
| **Variables** | **Study 1** | **Study 2** | **Study 3** | **Total** |
| **(n=551)** | **(n=155)** | **(n=490)** | **(N=1196)** |
| Age | 48(43-51) | 47(42-57) | 57.5(52-69) | 50(45-58) |
| BMI | 24.46(22.53-26.49) | 24.57(22.75-26.35) | 26.19(24.34-28.18) | 25.25(23.21-27.34) |
| SBP | 120(110-126) | 121(115-127) | 130(120-142) | 121(112-133) |
| DBP | 80(70-85) | 80(72-84) | 71(64-79) | 76(69-82) |
| FPG | 5.2(4.9-5.6) | 5.1(4.8-5.3) | 7.31(6.23-8.87) | 5.57(5.02-7.05) |
| TC | 5.05(4.48-5.73) | 4.59(4.07-5.07) | 4.38(3.67-5.08) | 4.72(4.12-5.4) |
| TG | 1.13(0.82-1.74) | 1.22(0.88-1.97) | 1.35(0.94-1.88) | 1.22(0.87-1.84) |
| LDLC | 2.75(2.29-3.24) | 2.57(2.22-2.9) | 2.71(2.13-3.34) | 2.7(2.24-3.23) |
| WHR | 0.82(0.77-0.87) | 0.89(0.84-0.91) | 0.93(0.9-0.97) | 0.88(0.81-0.94) |
| HDLC | 1.6(1.4-1.82) | 1.31(1-1.6) | 1.19(1.04-1.39) | 1.4(1.14-1.67) |
| Male, n (%) | 182(33.03) | 113(72.9) | 413(84.29) | 708(59.20) |
| Obesity-central adiposity, n (%) |  |  |  |  |
| NW | 383(69.51) | 76(49.03) | 86(17.55) | 545(45.57) |
| ONCA | 29(5.26) | 6(3.87) | 13(2.65) | 48(4.01) |
| NWCA | 91(16.52) | 64(41.29) | 272(55.51) | 427(35.70) |
| OCA | 48(8.71) | 9(5.81) | 119(24.29) | 176(14.72) |
| Obesity | 77(13.97) | 15(9.68) | 132(26.94) | 224(18.73) |
| Central adiposity | 139(25.23) | 73(47.10) | 391(79.80) | 603(50.42) |

Data are shown as median (P25-P75) and n (proportion).

Study 1: populations in Xicheng community-based cohort in the Xuanwu hospital, Beijing;

Study 2: populations in China suboptimal health cohort study in the Jidong Oil-field hospital, Chinese National Petroleum;

Study 3: populations in Beijing health management cohort in the Beijing Xiaotangshan hospital, Beijing.

NW, normal BMI with normal WHR; ONCA: obesity with normal WHR; NWCA: normal BMI with central adiposity; OCA: obesity with central adiposity.

| **Table S2. Associations of normalized IgG *N*-glycans with NWCA, ONCA and OCA after adjusted for age, sex, hypertension,** **diabetes and dyslipidemia** | | | | | | | | |
| --- | --- | --- | --- | --- | --- | --- | --- | --- |
| IgG glycans | NWCA vs NW | |  | ONCA vs NW | | OCA vs NW | | |
| Adjusted OR (95%CI) | *P* |  | Adjusted OR (95%CI) | *P* |  | Adjusted OR (95%CI) | *P* |
| GP1 | 1.108(0.808-1.519) | 0.5248 |  | 0.605(0.165-2.218) | 0.4482 |  | 0.583(0.297-1.144) | 0.1164 |
| GP2 | 1.118(0.957-1.307) | 0.1599 |  | 0.952(0.635-1.426) | 0.8104 |  | 0.984(0.789-1.227) | 0.8831 |
| GP3 | 0.942(0.825-1.077) | 0.3823 |  | 0.839(0.531-1.327) | 0.4535 |  | 0.828(0.617-1.112) | 0.2108 |
| GP4 | 1.271(1.068-1.511) | 0.0068 |  | 0.892(0.62-1.283) | 0.5372 |  | 1.252(0.996-1.575) | 0.0541 |
| GP5 | 0.567(0.466-0.69) | <.0001 |  | 0.705(0.466-1.068) | 0.0991 |  | 0.619(0.479-0.8) | 0.0003 |
| GP6 | 1.061(0.891-1.264) | 0.5072 |  | 0.741(0.479-1.147) | 0.1784 |  | 0.992(0.786-1.252) | 0.948 |
| GP7 | 0.747(0.635-0.878) | 0.0004 |  | 0.808(0.575-1.135) | 0.219 |  | 0.655(0.519-0.828) | 0.0004 |
| GP8 | 0.989(0.85-1.151) | 0.891 |  | 1.133(0.831-1.546) | 0.4303 |  | 0.911(0.741-1.121) | 0.3781 |
| GP9 | 1.12(0.963-1.303) | 0.141 |  | 1.053(0.777-1.428) | 0.739 |  | 1.064(0.87-1.302) | 0.5463 |
| GP10 | 0.824(0.71-0.957) | 0.0112 |  | 0.913(0.651-1.281) | 0.5993 |  | 0.739(0.595-0.916) | 0.0059 |
| GP11 | 0.85(0.735-0.983) | 0.0289 |  | 0.756(0.528-1.084) | 0.1286 |  | 0.724(0.579-0.905) | 0.0046 |
| GP12 | 0.896(0.766-1.048) | 0.1692 |  | 0.832(0.59-1.173) | 0.2947 |  | 0.865(0.695-1.076) | 0.1924 |
| GP13 | 0.653(0.543-0.787) | <.0001 |  | 0.85(0.59-1.224) | 0.3823 |  | 0.655(0.503-0.852) | 0.0016 |
| GP14 | 0.893(0.754-1.058) | 0.1895 |  | 1.058(0.754-1.485) | 0.743 |  | 0.964(0.766-1.215) | 0.7581 |
| GP15 | 0.697(0.587-0.828) | <.0001 |  | 0.915(0.649-1.291) | 0.6126 |  | 0.658(0.514-0.843) | 0.0009 |
| GP16 | 0.882(0.758-1.026) | 0.1034 |  | 1.234(0.904-1.685) | 0.1851 |  | 0.945(0.774-1.154) | 0.5788 |
| GP17 | 0.81(0.688-0.954) | 0.0115 |  | 0.751(0.525-1.073) | 0.1155 |  | 0.835(0.666-1.046) | 0.116 |
| GP18 | 0.815(0.685-0.97) | 0.0211 |  | 1.223(0.865-1.728) | 0.2543 |  | 0.939(0.748-1.178) | 0.5858 |
| GP19 | 1.28(1.013-1.617) | 0.0389 |  | 1.16(0.77-1.75) | 0.4778 |  | 1.041(0.828-1.308) | 0.7333 |
| GP20 | 0.761(0.619-0.935) | 0.0093 |  | 1.106(0.821-1.49) | 0.5077 |  | 0.842(0.68-1.041) | 0.1127 |
| GP21 | 0.97(0.832-1.129) | 0.6919 |  | 0.831(0.599-1.152) | 0.2657 |  | 0.969(0.796-1.179) | 0.7514 |
| GP22 | 1.108(0.943-1.302) | 0.2136 |  | 0.855(0.573-1.276) | 0.444 |  | 1.05(0.855-1.291) | 0.6413 |
| GP23 | 1.204(1.03-1.406) | 0.0194 |  | 1.087(0.792-1.492) | 0.6061 |  | 1.285(1.053-1.568) | 0.0137 |
| GP24 | 1.198(1.011-1.421) | **0.0373** |  | 1.098(0.77-1.564) | 0.6056 |  | 1.098(0.881-1.369) | 0.4055 |

OR: odds ratio; 95%CI: 95%confidence interval; GPx, glycan peak with “x” corresponding to number;

*P*<0.05 indicated significance

| **Table S3. Associations of normalized IgG derived glycans with NWCA, ONCA and OCA without adjusting for confounders** | | | | | | | | |
| --- | --- | --- | --- | --- | --- | --- | --- | --- |
| Variables | NWCA vs NW | | ONCA vs NW | | | OCA vs NW | | |
| Crude OR (95%CI) | *P* |  | Crude OR (95%CI) | *P* |  | Crude OR (95%CI) | *P* |
| FGS/(FG+FGS) | 0.786(0.686-0.901) | 0.0005 |  | 1.044(0.764-1.427) | 0.7871 |  | 0.874(0.737-1.037) | 0.1225 |
| FBGS/(FBG+FBGS) | 1.95(1.68-2.263) | <.0001 |  | 1.173(0.854-1.612) | 0.3236 |  | 1.826(1.52-2.194) | <.0001 |
| FGS/(F+FG+FGS) | 0.607(0.526-0.7) | <.0001 |  | 1.036(0.767-1.399) | 0.8193 |  | 0.683(0.572-0.816) | <.0001 |
| FBGS/(FB+FBG+FBGS) | 1.463(1.269-1.686) | <.0001 |  | 1.197(0.866-1.654) | 0.2766 |  | 1.43(1.205-1.696) | <.0001 |
| FG1S1/(FG1+FG1S1) | 0.91(0.798-1.036) | 0.1547 |  | 1.196(0.885-1.616) | 0.2436 |  | 1.1(0.931-1.3) | <.0001 |
| FG2S1/(FG2+FG2S1+FG2S2) | 0.795(0.678-0.933) | 0.0048 |  | 0.984(0.677-1.429) | 0.9309 |  | 0.816(0.685-0.973) | 0.0234 |
| FG2S2/(FG2+FG2S1+FG2S2) | 1.636(1.423-1.881) | <.0001 |  | 1.108(0.813-1.511) | 0.517 |  | 1.624(1.363-1.936) | <.0001 |
| FBG2S1/(FBG2+FBG2S1+FBG2S2) | 1.846(1.566-2.175) | <.0001 |  | 1.048(0.736-1.493) | 0.7937 |  | 1.53(1.26-1.858) | <.0001 |
| FBG2S2/(FBG2+FBG2S1+FBG2S2) | 2.12(1.82-2.47) | <.0001 |  | 1.207(0.892-1.635) | 0.2231 |  | 1.876(1.555-2.262) | <.0001 |
| FtotalS1/FtotalS2 | 0.447(0.376-0.532) | <.0001 |  | 0.906(0.677-1.214) | 0.5099 |  | 0.504(0.403-0.63) | <.0001 |
| FS1/FS2 | 0.583(0.499-0.681) | <.0001 |  | 0.913(0.669-1.246) | 0.5665 |  | 0.667(0.548-0.813) | <.0001 |
| FBS1/FBS2 | 0.675(0.558-0.815) | <.0001 |  | 0.786(0.514-1.202) | 0.2664 |  | 0.868(0.71-1.062) | 0.1694 |
| FBStotal/FStotal | 4.578(3.145-6.666) | <.0001 |  | 1.356(0.959-1.916) | 0.0849 |  | 2.548(1.641-3.957) | <.0001 |
| FBS1/FS1 | 13.259(5.924-29.673) | <.0001 |  | 1.529(0.943-2.48) | 0.085 |  | 3.307(1.247-8.768) | 0.0162 |
| FBS2/FS2 | 2.469(1.914-3.185) | <.0001 |  | 1.213(0.876-1.68) | 0.2443 |  | 1.725(1.286-2.314) | 0.0003 |
| FBS1/(FS1+FBS1) | 2.068(1.572-2.722) | <.0001 |  | 1.14(0.62-2.095) | 0.674 |  | 1.668(1.225-2.27) | 0.0011 |
| FBS2/(FS2+FBS2) | 1.481(1.292-1.699) | <.0001 |  | 1.1(0.803-1.506) | 0.5548 |  | 1.317(1.115-1.556) | 0.0012 |

**Table S3. (Continued)**

| Variables | NWCA vs NW | | ONCA vs NW | | | OCA vs NW | | |
| --- | --- | --- | --- | --- | --- | --- | --- | --- |
| Crude OR (95%C) | *P* |  | Crude OR (95%C) | *P* |  | Crude OR (95%C) | *P* |
| GP1n | 2.003(1.291-3.109) | 0.002 |  | 0.784(0.228-2.696) | 0.6998 |  | 1.106(0.633-1.932) | 0.7243 |
| GP2n | 1.647(1.41-1.924) | <.0001 |  | 0.982(0.713-1.352) | 0.9125 |  | 1.364(1.13-1.646) | 0.0012 |
| GP4n | 2.038(1.759-2.361) | <.0001 |  | 1.061(0.781-1.441) | 0.7052 |  | 1.928(1.61-2.309) | <.0001 |
| GP5n | 0.355(0.297-0.424) | <.0001 |  | 0.791(0.56-1.117) | 0.1834 |  | 0.414(0.33-0.52) | <.0001 |
| GP6n | 1.798(1.547-2.089) | <.0001 |  | 0.942(0.67-1.324) | 0.7309 |  | 1.655(1.386-1.977) | <.0001 |
| GP7n | 0.526(0.452-0.612) | <.0001 |  | 0.786(0.571-1.081) | 0.1386 |  | 0.466(0.373-0.581) | <.0001 |
| GP8n | 0.681(0.595-0.78) | <.0001 |  | 1.128(0.829-1.534) | 0.4438 |  | 0.635(0.531-0.758) | <.0001 |
| GP9n | 0.935(0.823-1.063) | 0.3048 |  | 1.159(0.862-1.558) | 0.328 |  | 0.969(0.821-1.144) | 0.7128 |
| GP10n | 0.765(0.671-0.873) | <.0001 |  | 0.97(0.702-1.34) | 0.8539 |  | 0.715(0.592-0.864) | 0.0005 |
| GP11n | 0.839(0.735-0.959) | 0.0099 |  | 0.854(0.604-1.208) | 0.3726 |  | 0.792(0.653-0.961) | 0.0184 |
| GP12n | 0.71(0.619-0.814) | <.0001 |  | 0.733(0.526-1.022) | 0.0672 |  | 0.645(0.529-0.785) | <.0001 |
| GP13n | 0.402(0.341-0.475) | <.0001 |  | 0.862(0.637-1.166) | 0.3351 |  | 0.432(0.348-0.536) | <.0001 |
| GP14n | 0.561(0.488-0.646) | <.0001 |  | 0.945(0.704-1.267) | 0.704 |  | 0.616(0.515-0.737) | <.0001 |
| GP15n | 0.46(0.395-0.536) | <.0001 |  | 0.89(0.659-1.202) | 0.4458 |  | 0.462(0.376-0.568) | <.0001 |
| G0n | 2.125(1.831-2.466) | <.0001 |  | 1.036(0.763-1.407) | 0.8206 |  | 1.942(1.622-2.326) | <.0001 |
| G1n | 0.571(0.495-0.658) | <.0001 |  | 1.158(0.833-1.61) | 0.383 |  | 0.572(0.48-0.681) | <.0001 |
| G2n | 0.525(0.455-0.606) | <.0001 |  | 0.911(0.681-1.219) | 0.5301 |  | 0.573(0.478-0.688) | <.0001 |

**Table S3. (Continued)**

| Variables | NWCA vs NW | | ONCA vs NW | | | OCA vs NW | | |
| --- | --- | --- | --- | --- | --- | --- | --- | --- |
| Crude OR (95%CI) | *P* |  | Crude OR (95%CI) | *P* |  | Crude OR (95%CI) | *P* |
| Fntotal | 1.39(1.214-1.592) | <.0001 |  | 1.328(0.952-1.852) | 0.0953 |  | 1.601(1.311-1.954) | <.0001 |
| FG0ntotal/G0n | 0.798(0.701-0.91) | 0.0007 |  | 1.082(0.775-1.509) | 0.6447 |  | 0.904(0.764-1.069) | 0.2383 |
| FG1ntotal/G1n | 1.802(1.553-2.091) | <.0001 |  | 1.284(0.931-1.772) | 0.1281 |  | 2.052(1.648-2.556) | <.0001 |
| FG2ntotal/G2n | 1.191(1.044-1.358) | 0.0093 |  | 1.381(0.97-1.965) | 0.0731 |  | 1.409(1.16-1.711) | 0.0005 |
| Fn | 1.127(0.992-1.281) | 0.0661 |  | 1.215(0.873-1.692) | 0.2477 |  | 1.208(1.007-1.449) | 0.0423 |
| FG0n/G0n | 1.064(0.937-1.209) | 0.3365 |  | 1.154(0.836-1.593) | 0.3841 |  | 1.128(0.944-1.347) | 0.1857 |
| FG1n/G1n | 1.255(1.103-1.428) | 0.0006 |  | 1.163(0.846-1.598) | 0.3515 |  | 1.289(1.075-1.545) | 0.0061 |
| FG2n/G2n | 1.433(1.249-1.645) | <.0001 |  | 1.332(0.948-1.872) | 0.0984 |  | 1.621(1.332-1.973) | <.0001 |
| FBn | 0.995(0.876-1.129) | 0.9339 |  | 0.905(0.649-1.263) | 0.5582 |  | 0.975(0.814-1.168) | 0.784 |
| FBG0n/G0n | 0.866(0.76-0.986) | 0.0298 |  | 0.871(0.632-1.2) | 0.3974 |  | 0.841(0.703-1.007) | 0.0592 |
| FBG1n/G1n | 0.887(0.781-1.008) | 0.0661 |  | 0.904(0.656-1.244) | 0.5338 |  | 0.884(0.739-1.057) | 0.1771 |
| FBG2n/G2n | 0.672(0.58-0.778) | <.0001 |  | 0.893(0.633-1.258) | 0.5158 |  | 0.656(0.534-0.807) | <.0001 |
| FBn/Fn | 0.99(0.872-1.123) | 0.8712 |  | 0.877(0.623-1.234) | 0.4506 |  | 0.958(0.798-1.15) | 0.6428 |
| Fn/(Bn+FBn) | 0.975(0.859-1.107) | 0.6971 |  | 0.886(0.635-1.236) | 0.4767 |  | 0.947(0.791-1.134) | 0.5535 |
| Bn/(Fn+FBn) | 1.145(1.008-1.301) | 0.0369 |  | 1.087(0.788-1.499) | 0.6117 |  | 1.167(0.978-1.393) | 0.087 |
| FBG2n/FG2n | 0.401(0.34-0.475) | <.0001 |  | 0.856(0.632-1.159) | 0.3143 |  | 0.43(0.346-0.535) | <.0001 |
| FG2n/(BG2n+FBG2n) | 0.654(0.557-0.767) | <.0001 |  | 0.849(0.578-1.246) | 0.402 |  | 0.618(0.492-0.776) | <.0001 |
| BG2n/(FG2n+FBG2n) | 0.667(0.576-0.772) | <.0001 |  | 0.862(0.609-1.22) | 0.4032 |  | 0.641(0.521-0.787) | <.0001 |
| FBn/Fntotal | 1.696(1.469-1.958) | <.0001 |  | 1.071(0.762-1.504) | 0.6931 |  | 1.623(1.359-1.939) | <.0001 |
| FBG2n/(FG2n+FBG2n) | 0.553(0.475-0.644) | <.0001 |  | 0.896(0.655-1.225) | 0.4913 |  | 0.549(0.447-0.673) | <.0001 |

| **Table S4. Associations of normalized IgG derived glycans with NWCA, ONCA and OCA adjusting for age, sex, hypertension, diabetes and dyslipidemia** | | | | | | | | |
| --- | --- | --- | --- | --- | --- | --- | --- | --- |
| Derived glycan traits | NWCA vs NW | | ONCA vs NW | | | OCA vs NW | | |
| Adjusted OR (95%CI) | *P* |  | Adjusted OR (95%CI) | *P* |  | Adjusted OR (95%CI) | *P* |
| FGS/(FG+FGS) | 0.875(0.745-1.028) | 0.1036 |  | 1.123(0.803-1.57) | 0.497 |  | 1.003(0.813-1.237) | 0.9796 |
| FBGS/(FBG+FBGS) | 1.434(1.216-1.692) | <.0001 |  | 1.132(0.793-1.617) | 0.4935 |  | 1.344(1.074-1.683) | 0.0099 |
| FGS/(F+FG+FGS) | 0.822(0.695-0.973) | 0.0227 |  | 1.177(0.842-1.646) | 0.3397 |  | 0.928(0.745-1.155) | 0.5038 |
| FBGS/(FB+FBG+FBGS) | 1.324(1.126-1.557) | 0.0007 |  | 1.204(0.856-1.694) | 0.2869 |  | 1.256(1.013-1.558) | 0.0379 |
| FG1S1/(FG1+FG1S1) | 0.868(0.744-1.011) | 0.0692 |  | 1.148(0.835-1.579) | 0.3941 |  | 0.98(0.805-1.193) | 0.8394 |
| FG2S1/(FG2+FG2S1+FG2S2) | 0.775(0.637-0.943) | 0.0108 |  | 1.007(0.694-1.463) | 0.9689 |  | 0.853(0.667-1.09) | 0.2035 |
| FG2S2/(FG2+FG2S1+FG2S2) | 1.315(1.123-1.539) | 0.0007 |  | 1.051(0.754-1.464) | 0.7693 |  | 1.306(1.061-1.608) | 0.0119 |
| FBG2S1/(FBG2+FBG2S1+FBG2S2) | 1.394(1.16-1.676) | 0.0004 |  | 0.977(0.668-1.429) | 0.905 |  | 1.156(0.912-1.464) | 0.2298 |
| FBG2S2/(FBG2+FBG2S1+FBG2S2) | 1.329(1.115-1.584) | 0.0015 |  | 1.148(0.805-1.638) | 0.4461 |  | 1.278(1.022-1.596) | 0.0312 |
| FtotalS1/FtotalS2 | 0.699(0.579-0.843) | 0.0002 |  | 0.974(0.709-1.338) | 0.8714 |  | 0.783(0.614-0.999) | 0.0492 |
| FS1/FS2 | 0.721(0.604-0.86) | 0.0003 |  | 0.94(0.68-1.298) | 0.7059 |  | 0.803(0.653-0.987) | 0.037 |
| FBS1/FBS2 | 0.956(0.807-1.132) | 0.5984 |  | 0.823(0.525-1.289) | 0.3947 |  | 0.981(0.81-1.188) | 0.8436 |
| FBStotal/FStotal | 1.496(1.032-2.167) | 0.0335 |  | 1.286(0.866-1.911) | 0.2125 |  | 1.147(0.847-1.553) | 0.3739 |
| FBS1/FS1 | 1.861(0.84-4.123) | 0.1257 |  | 1.453(0.857-2.462) | 0.1653 |  | 1.216(0.785-1.883) | 0.3807 |
| FBS2/FS2 | 1.372(1.062-1.772) | 0.0154 |  | 1.13(0.776-1.644) | 0.5241 |  | 1.084(0.846-1.388) | 0.5229 |
| FBS1/(FS1+FBS1) | 0.921(0.669-1.268) | 0.6141 |  | 0.868(0.419-1.799) | 0.7035 |  | 0.987(0.853-1.141) | 0.8545 |
| FBS2/(FS2+FBS2) | 0.973(0.824-1.148) | 0.7445 |  | 0.965(0.665-1.399) | 0.8503 |  | 0.825(0.666-1.022) | 0.0783 |

**Table S4. (Continued)**

| Derived glycan traits | NWCA vs NW | | ONCA vs NW | | | OCA vs NW | | |
| --- | --- | --- | --- | --- | --- | --- | --- | --- |
| Adjusted OR (95%CI) | *P* |  | Adjusted OR (95%CI) | *P* |  | Adjusted OR (95%CI) | *P* |
| GP1n | 1.097(0.807-1.492) | 0.5525 |  | 0.638(0.179-2.277) | 0.4885 |  | 0.582(0.297-1.142) | 0.1157 |
| GP2n | 1.113(0.953-1.299) | 0.1763 |  | 0.95(0.636-1.418) | 0.8001 |  | 0.979(0.785-1.221) | 0.851 |
| GP4n | 1.288(1.082-1.534) | 0.0045 |  | 0.905(0.63-1.301) | 0.5903 |  | 1.291(1.024-1.628) | 0.0305 |
| GP5n | 0.552(0.452-0.675) | <.0001 |  | 0.718(0.472-1.092) | 0.1215 |  | 0.61(0.469-0.792) | 0.0002 |
| GP6n | 1.044(0.877-1.243) | 0.6308 |  | 0.74(0.477-1.148) | 0.1788 |  | 0.98(0.773-1.242) | 0.8686 |
| GP7n | 0.73(0.619-0.862) | 0.0002 |  | 0.82(0.585-1.151) | 0.2512 |  | 0.644(0.508-0.817) | 0.0003 |
| GP8n | 0.93(0.794-1.09) | 0.3711 |  | 1.263(0.912-1.75) | 0.1598 |  | 0.896(0.725-1.108) | 0.311 |
| GP9n | 1.085(0.932-1.262) | 0.2925 |  | 1.114(0.819-1.515) | 0.4931 |  | 1.055(0.863-1.29) | 0.5983 |
| GP10n | 0.802(0.69-0.931) | 0.0038 |  | 0.961(0.69-1.338) | 0.8132 |  | 0.72(0.578-0.896) | 0.0032 |
| GP11n | 0.828(0.715-0.957) | 0.0109 |  | 0.786(0.55-1.121) | 0.1837 |  | 0.705(0.563-0.882) | 0.0023 |
| GP12n | 0.882(0.753-1.033) | 0.1183 |  | 0.848(0.605-1.19) | 0.3412 |  | 0.859(0.689-1.072) | 0.1786 |
| GP13n | 0.64(0.529-0.774) | <.0001 |  | 0.882(0.614-1.267) | 0.4977 |  | 0.655(0.501-0.856) | 0.0019 |
| GP14n | 0.879(0.741-1.044) | 0.1412 |  | 1.104(0.784-1.554) | 0.5698 |  | 0.967(0.768-1.218) | 0.7764 |
| GP15n | 0.689(0.578-0.821) | <.0001 |  | 0.962(0.685-1.352) | 0.8252 |  | 0.661(0.514-0.851) | 0.0013 |
| G0n | 1.276(1.066-1.527) | 0.0077 |  | 0.863(0.59-1.261) | 0.4457 |  | 1.237(0.976-1.566) | 0.0781 |
| G1n | 0.832(0.705-0.981) | 0.0284 |  | 1.248(0.869-1.793) | 0.231 |  | 0.765(0.618-0.948) | 0.0144 |
| G2n | 0.83(0.697-0.988) | 0.0356 |  | 1.059(0.754-1.488) | 0.7411 |  | 0.901(0.713-1.139) | 0.3854 |

**Supplement Table 4. (Continued)**

| Derived glycan traits | NWCA vs NW | | ONCA vs NW | | | OCA vs NW | | |
| --- | --- | --- | --- | --- | --- | --- | --- | --- |
| Adjusted OR (95%CI) | *P* |  | Adjusted OR (95%CI) | *P* |  | Adjusted OR (95%CI) | *P* |
| Fntotal | 1.174(1.006-1.369) | 0.0416 |  | 1.197(0.852-1.681) | 0.3004 |  | 1.289(1.033-1.608) | 0.0244 |
| FG0ntotal/G0n | 0.946(0.818-1.095) | 0.4599 |  | 1.065(0.75-1.512) | 0.7255 |  | 1.096(0.885-1.357) | 0.402 |
| FG1ntotal/G1n | 1.338(1.137-1.575) | 0.0005 |  | 1.225(0.873-1.719) | 0.2397 |  | 1.516(1.197-1.918) | 0.0005 |
| FG2ntotal/G2n | 1.122(0.963-1.307) | 0.1386 |  | 1.253(0.871-1.803) | 0.2237 |  | 1.226(0.988-1.521) | 0.0646 |
| Fn | 1.227(1.057-1.423) | 0.007 |  | 1.241(0.882-1.745) | 0.2157 |  | 1.369(1.106-1.693) | 0.0039 |
| FG0n/G0n | 1.166(1.006-1.35) | 0.0408 |  | 1.156(0.829-1.61) | 0.3926 |  | 1.31(1.062-1.616) | 0.0117 |
| FG1n/G1n | 1.275(1.097-1.481) | 0.0015 |  | 1.181(0.852-1.637) | 0.3182 |  | 1.372(1.111-1.694) | 0.0034 |
| FG2n/G2n | 1.284(1.099-1.5) | 0.0017 |  | 1.292(0.902-1.851) | 0.1624 |  | 1.418(1.135-1.771) | 0.0021 |
| FBn | 0.838(0.722-0.973) | 0.0202 |  | 0.837(0.59-1.187) | 0.3176 |  | 0.762(0.614-0.946) | 0.0138 |
| FBG0n/G0n | 0.826(0.714-0.957) | 0.0108 |  | 0.864(0.621-1.202) | 0.3853 |  | 0.752(0.608-0.929) | 0.0082 |
| FBG1n/G1n | 0.817(0.704-0.949) | 0.0082 |  | 0.874(0.628-1.217) | 0.4262 |  | 0.774(0.627-0.956) | 0.0175 |
| FBG2n/G2n | 0.759(0.644-0.895) | 0.0011 |  | 0.846(0.584-1.226) | 0.3773 |  | 0.704(0.557-0.891) | 0.0034 |
| FBn/Fn | 0.846(0.73-0.98) | 0.0262 |  | 0.816(0.57-1.167) | 0.2654 |  | 0.759(0.611-0.945) | 0.0135 |
| Fn/(Bn+FBn) | 0.833(0.718-0.967) | 0.016 |  | 0.827(0.584-1.171) | 0.2849 |  | 0.755(0.608-0.936) | 0.0104 |
| Bn/(Fn+FBn) | 1.273(1.095-1.481) | 0.0017 |  | 1.145(0.822-1.595) | 0.4245 |  | 1.372(1.115-1.69) | 0.0029 |
| FBG2n/FG2n | 0.639(0.528-0.774) | <.0001 |  | 0.876(0.61-1.258) | 0.4737 |  | 0.655(0.501-0.856) | 0.002 |
| FG2n/(BG2n+FBG2n) | 0.747(0.625-0.894) | 0.0014 |  | 0.805(0.535-1.211) | 0.2976 |  | 0.674(0.521-0.871) | 0.0026 |
| BG2n/(FG2n+FBG2n) | 0.756(0.641-0.89) | 0.0008 |  | 0.825(0.57-1.195) | 0.3091 |  | 0.696(0.551-0.879) | 0.0023 |
| FBn/Fntotal | 1.413(1.197-1.666) | <.0001 |  | 1.102(0.763-1.59) | 0.6049 |  | 1.421(1.146-1.761) | 0.0014 |
| FBG2n/(FG2n+FBG2n) | 0.729(0.617-0.861) | 0.0002 |  | 0.841(0.587-1.205) | 0.3458 |  | 0.693(0.545-0.882) | 0.0028 |

S, sialic acid; G, galactose; B, bisecting GlcNAc; F, core fucose
